# Supplementary material for: The Clinicopathological Significance of the Cyclin D1/E1–Cyclin-Dependent Kinase (CDK2/4/6)–Retinoblastoma (RB1/pRB1) Pathway in Epithelial Ovarian Cancers
Source: MDPI journal article supplement (doi:10.3390/ijms25074060), 2024-04-05
Supplement: s1 [file s1]

**Supplementary Table S1.** Clinicopathological characteristics of the ovarian cancer cohort.

| <b>Parameters</b>                        | <b>Number (%)</b> |
|------------------------------------------|-------------------|
| <b>Surgical Pathology Type</b>           |                   |
| Serous                                   | 154 (56%)         |
| Mucinous                                 | 39 (14%)          |
| Endometrioid                             | 42 (15%)          |
| Clear Cell                               | 16 (6%)           |
| Other                                    | 13 (5%)           |
| Mixed                                    | 12 (4%)           |
| <b>Surgical Pathology Grade</b>          |                   |
| Low                                      | 40 (17%)          |
| Med                                      | 57 (25%)          |
| High                                     | 134 (58%)         |
| <b>Surgical Pathology Stage</b>          |                   |
| 1                                        | 101 (39%)         |
| 2                                        | 43 (17%)          |
| 3                                        | 108 (41%)         |
| 4                                        | 10 (3%)           |
| <b>Residual Tumour Following Surgery</b> |                   |
| Non                                      | 170 (69%)         |
| <1cm                                     | 27 (11%)          |
| 1-2cm                                    | 13 (5%)           |
| >2cm                                     | 38 (15%)          |
| <b>Platinum Sensitivity</b>              |                   |
| Sensitive                                | 217 (92%)         |
| Resistant                                | 20 (8%)           |

**Supplementary Table S2:** Cytoplasmic CDK2 expression and clinicopathological parameters.

| Parameters                   | Cytoplasmic CDK2 expression |              | <i>p value</i> | <i>Adjusted<br/>p value</i> |
|------------------------------|-----------------------------|--------------|----------------|-----------------------------|
|                              | <i>Low</i>                  | <i>High</i>  |                |                             |
|                              | <i>N (%)</i>                | <i>N (%)</i> |                |                             |
| Pathology Type               |                             |              |                |                             |
| Serous                       | 103 (48%)                   | 58 (72%)     | 0.001          | 0.005                       |
| Mucinous                     | 40 (19%)                    | 3 (4%)       |                |                             |
| Endometrioid                 | 31 (15%)                    | 9 (11%)      |                |                             |
| Clear Cell                   | 22 (10%)                    | 2 (2%)       |                |                             |
| Other                        | 7 (3%)                      | 4 (5%)       |                |                             |
| Mixed                        | 11 (5%)                     | 5 (6%)       |                |                             |
| Pathology Grade              |                             |              |                |                             |
| Low                          | 32 (18%)                    | 6 (8%)       | 0.069          | 0.069                       |
| Med                          | 39 (22%)                    | 15 (19%)     |                |                             |
| High                         | 104 (60%)                   | 55 (73%)     |                |                             |
| Pathology Stage              |                             |              |                |                             |
| 1                            | 92 (45%)                    | 20 (25%)     | 0.0271         | 0.11                        |
| 2                            | 30 (14%)                    | 13 (16%)     |                |                             |
| 3                            | 77 (38%)                    | 42 (54%)     |                |                             |
| 4                            | 6 (3%)                      | 3 (5%)       |                |                             |
| Residual tumour post Surgery |                             |              |                |                             |
| Non                          | 149 (75%)                   | 41 (58%)     | 0.036          | 0.07                        |
| <1cm                         | 20 (10%)                    | 13 (18%)     |                |                             |
| 1-2cm                        | 6 (3%)                      | 6 (8%)       |                |                             |
| >2cm                         | 23 (12%)                    | 11 (16%)     |                |                             |
| Platinum Sensitivity         |                             |              | 0.027          | 0.08                        |
| Sensitive                    | 164 (89%)                   | 64 (97%)     |                |                             |
| Resistant                    | 20 (11%)                    | 2 (3%)       |                |                             |

Significant p values are in bold.

Adjusted p value was calculated using Bonferroni correction.

**Supplementary Table S3:** Nuclear and cytoplasmic CDK2 co-expression and clinicopathological parameters.

| Parameters                   | Nuclear (n) and cytoplasmic (c) co-expression |                         |                          |                         | <i>p value</i> | <i>Adjusted<br/>p value</i> |
|------------------------------|-----------------------------------------------|-------------------------|--------------------------|-------------------------|----------------|-----------------------------|
|                              | <i>Low (n)-low (c)</i>                        | <i>High (n)-low (c)</i> | <i>High (n)-high (c)</i> | <i>Low (n)-high (c)</i> |                |                             |
|                              | <i>N (%)</i>                                  | <i>N (%)</i>            | <i>N (%)</i>             | <i>N (%)</i>            |                |                             |
| Pathology Type               |                                               |                         |                          |                         |                |                             |
| Serous                       | 73 (45%)                                      | 36 (67%)                | 23 (83%)                 | 29 (56%)                | 0.001          | 0.007                       |
| Mucinous                     | 36 (22%)                                      | 2 (4%)                  | 1 (3%)                   | 4 (8%)                  |                |                             |
| Endometrioid                 | 26 (16%)                                      | 7 (13%)                 | 2 (8%)                   | 5 (9%)                  |                |                             |
| Clear Cell                   | 12 (8%)                                       | 2 (4%)                  | 0 (0%)                   | 10 (19%)                |                |                             |
| Other                        | 6 (4%)                                        | 3 (5%)                  | 1 (3%)                   | 1 (2%)                  |                |                             |
| Mixed                        | 8 (5%)                                        | 4 (7%)                  | 1 (3%)                   | 3 (6%)                  |                |                             |
| Pathology Grade              |                                               |                         |                          |                         |                |                             |
| Low                          | 26 (20%)                                      | 5 (10%)                 | 1 (4%)                   | 6 (13%)                 | 0.004          | 0.02                        |
| Med                          | 36 (28%)                                      | 11 (21%)                | 4 (15%)                  | 3 (7%)                  |                |                             |
| High                         | 67 (52%)                                      | 35 (69%)                | 21 (81%)                 | 36 (80%)                |                |                             |
| Pathology Stage              |                                               |                         |                          |                         |                |                             |
| 1                            | 75 (49%)                                      | 14 (27%)                | 6 (21%)                  | 17 (33%)                | 0.022          | 0.08                        |
| 2                            | 24 (16%)                                      | 8 (16%)                 | 5 (18%)                  | 6 (11%)                 |                |                             |
| 3                            | 49 (32%)                                      | 26 (51%)                | 17 (61%)                 | 27 (52%)                |                |                             |
| 4                            | 4 (3%)                                        | 3 (6%)                  | 0 (0%)                   | 2 (4%)                  |                |                             |
| Residual tumour post-surgery |                                               |                         |                          |                         |                |                             |
| None                         | 115 (77%)                                     | 27 (58%)                | 14 (56%)                 | 34 (71%)                | 0.081          | 0.24                        |
| <1cm                         | 15 (10%)                                      | 7 (15%)                 | 6 (24%)                  | 5 (10%)                 |                |                             |
| 1-2cm                        | 4 (3%)                                        | 3 (6%)                  | 3 (12%)                  | 2 (4%)                  |                |                             |
| >2cm                         | 15 (10%)                                      | 10 (21%)                | 2 (8%)                   | 7 (15%)                 |                |                             |

|                             |           |          |           |          |       |      |
|-----------------------------|-----------|----------|-----------|----------|-------|------|
| <b>Platinum Sensitivity</b> |           |          |           |          | 0.176 | 0.34 |
| Sensitive                   | 126 (91%) | 42 (93%) | 22 (100%) | 38 (84%) |       |      |
| Resistant                   | 12 (9%)   | 3 (7%)   | 0 (0.0%)  | 7 (16%)  |       |      |

Significant p values are in bold.

Adjusted p value was calculated using Bonferroni correction.

**Supplementary Table S4:** Nuclear CDK4 expression and clinicopathological parameters.

| Parameters                        | Nuclear CDK4 expression |              | <i>p value</i> | <i>Adjusted<br/>p value</i> |
|-----------------------------------|-------------------------|--------------|----------------|-----------------------------|
|                                   | <i>Low</i>              | <i>High</i>  |                |                             |
|                                   | <i>N (%)</i>            | <i>N (%)</i> |                |                             |
| Surgical Pathology Type           |                         |              |                |                             |
| Serous                            | 137 (57%)               | 26 (54%)     | 0.894          | 0.894                       |
| Mucinous                          | 35 (15%)                | 5 (11%)      |                |                             |
| Endometrioid                      | 32 (13%)                | 7 (15%)      |                |                             |
| Clear Cell                        | 18 (7%)                 | 4 (8%)       |                |                             |
| Other                             | 8 (3%)                  | 3 (6%)       |                |                             |
| Mixed                             | 12 (5%)                 | 3 (6%)       |                |                             |
| Surgical Pathology Grade          |                         |              |                |                             |
| Low                               | 34 (16%)                | 7 (16%)      | 0.492          | 0.492                       |
| Med                               | 41 (20%)                | 12 (28%)     |                |                             |
| High                              | 131 (64%)               | 24 (56%)     |                |                             |
| Surgical Pathology Stage          |                         |              |                |                             |
| 1                                 | 97 (42%)                | 16 (34%)     | 0.6            | 0.6                         |
| 2                                 | 36 (15%)                | 10 (21%)     |                |                             |
| 3                                 | 91 (39%)                | 20 (43%)     |                |                             |
| 4                                 | 9 (4%)                  | 1 (2%)       |                |                             |
| Residual Tumour Following Surgery |                         |              |                |                             |
| Non                               | 155 (71%)               | 30 (68%)     | 0.687          | 0.687                       |
| <1cm                              | 25 (11%)                | 6 (14%)      |                |                             |
| 1-2cm                             | 13 (6%)                 | 1 (2%)       |                |                             |
| >2cm                              | 27 (12%)                | 7 (16%)      |                |                             |
| Platinum Sensitivity              |                         |              | 0.856          | 0.856                       |
| Sensitive                         | 190 (91%)               | 36 (90%)     |                |                             |
| Resistant                         | 19 (10%)                | 4 (10%)      |                |                             |

Significant p values are in bold.

Adjusted p value was calculated using Bonferroni correction.

**Supplementary Table S5:** Cytoplasmic CDK4 expression and clinicopathological parameters.

| Parameters                   | Cytoplasmic CDK4 expression |              | <i>p value</i> | <i>Adjusted P value</i> |
|------------------------------|-----------------------------|--------------|----------------|-------------------------|
|                              | <i>Low</i>                  | <i>High</i>  |                |                         |
|                              | <i>N (%)</i>                | <i>N (%)</i> |                |                         |
| Pathology Type               |                             |              |                |                         |
| Serous                       | 91 (46%)                    | 72 (79%)     | <0.0001        | <0.0001                 |
| Mucinous                     | 38 (19%)                    | 2 (2%)       |                |                         |
| Endometriod                  | 30 (15%)                    | 9 (10%)      |                |                         |
| Clear Cell                   | 20 (10%)                    | 2 (2%)       |                |                         |
| Other                        | 8 (4%)                      | 3 (3%)       |                |                         |
| Mixed                        | 11 (6%)                     | 4 (4%)       |                |                         |
| Pathology Grade              |                             |              |                |                         |
| Low                          | 38 (23%)                    | 3 (4%)       | <0.0001        | <0.0001                 |
| Med                          | 41 (24%)                    | 12 (14%)     |                |                         |
| High                         | 88 (53%)                    | 67 (82%)     |                |                         |
| Pathology Stage              |                             |              |                |                         |
| 1                            | 89 (47%)                    | 24 (27%)     | 0.001          | 0.003                   |
| 2                            | 32 (17%)                    | 14 (15%)     |                |                         |
| 3                            | 60 (32%)                    | 51 (56%)     |                |                         |
| 4                            | 8 (4%)                      | 2 (2%)       |                |                         |
| Residual tumour post-surgery |                             |              |                |                         |
| None                         | 140 (76%)                   | 45 (57%)     | 0.018          | 0.036                   |
| <1cm                         | 17 (9%)                     | 14 (18%)     |                |                         |
| 1-2cm                        | 7 (4%)                      | 7 (9%)       |                |                         |
| >2cm                         | 21 (11%)                    | 13 (16%)     |                |                         |
| Platinum Sensitivity         |                             |              | 0.641          | 0.641                   |

|           |           |          |
|-----------|-----------|----------|
| Sensitive | 158 (91%) | 68 (90%) |
| Resistant | 15 (9%)   | 8 (10%)  |

Significant p values are in bold.

Adjusted p value was calculated using Bonferroni correction.

Supplementary Table S6: Nuclear and cytoplasmic CDK4 co-expression and clinicopathological parameters

| Parameters                   | CDK4 Nuclear (n) and cytoplasmic (c) co-expression |                  |                   |                  | <i>p value</i> | <i>Adjusted P value</i> |
|------------------------------|----------------------------------------------------|------------------|-------------------|------------------|----------------|-------------------------|
|                              | Low (n)-low (c)                                    | High (n)-low (c) | High (n)-high (c) | Low (n)-high (c) |                |                         |
|                              | <i>N (%)</i>                                       | <i>N (%)</i>     | <i>N (%)</i>      | <i>N (%)</i>     |                |                         |
| Pathology Type               |                                                    |                  |                   |                  |                |                         |
| Serous                       | 77 (47%)                                           | 14 (42%)         | 12 (79%)          | 60 (78%)         | 0.003          | 0.01                    |
| Mucinous                     | 33 (20%)                                           | 5 (15%)          | 0 (0%)            | 2 (2%)           |                |                         |
| Endometrioid                 | 24 (14%)                                           | 6 (18%)          | 1 (7%)            | 8 (10%)          |                |                         |
| Clear Cell                   | 16 (10%)                                           | 4 (12%)          | 0 (0%)            | 2 (3%)           |                |                         |
| Other                        | 6 (4%)                                             | 2 (6%)           | 1 (7%)            | 2 (3%)           |                |                         |
| Mixed                        | 9 (5%)                                             | 2 (6%)           | 1 (7%)            | 3 (4%)           |                |                         |
| Pathology Grade              |                                                    |                  |                   |                  |                |                         |
| Low                          | 31 (23%)                                           | 7 (23%)          | 0 (0%)            | 3 (4%)           | 0.001          | 0.007                   |
| Med                          | 32 (23%)                                           | 9 (30%)          | 3 (23%)           | 9 (13%)          |                |                         |
| High                         | 74 (54%)                                           | 14 (47%)         | 10 (77%)          | 57 (83%)         |                |                         |
| Pathology Stage              |                                                    |                  |                   |                  |                |                         |
| 1                            | 75 (48%)                                           | 14 (44%)         | 2 (13%)           | 22 (29%)         | 0.01           | 0.05                    |
| 2                            | 24 (15%)                                           | 8 (25%)          | 2 (13%)           | 12 (16%)         |                |                         |
| 3                            | 51 (33%)                                           | 9 (28%)          | 11 (74%)          | 40 (52%)         |                |                         |
| 4                            | 7 (4%)                                             | 1 (3%)           | 0(0%)             | 2 (3%)           |                |                         |
| Residual Tumour post-surgery |                                                    |                  |                   |                  |                |                         |
| None                         | 114 (74%)                                          | 26 (84%)         | 4 (31%)           | 41 (62%)         | 0.03           | 0.12                    |
| <1cm                         | 15 (10%)                                           | 2 (6%)           | 4 (31%)           | 10 (15%)         |                |                         |
| 1-2cm                        | 7 (4%)                                             | 0 (0%)           | 1 (7%)            | 6 (9%)           |                |                         |



|                             |           |          |          |          |       |      |
|-----------------------------|-----------|----------|----------|----------|-------|------|
| <b>&gt;2cm</b>              | 18 (12%)  | 3 (10%)  | 4 (31%)  | 9 (14%)  |       |      |
| <b>Platinum Sensitivity</b> |           |          |          |          | 0.869 | 0.86 |
| Sensitive                   | 133 (91%) | 25 (93%) | 11 (85%) | 57 (90%) |       |      |
| Resistant                   | 13 (9%)   | 2 (7%)   | 2 (15%)  | 6 (10%)  |       |      |

Significant p values are in bold.

Adjusted p value was calculated using Bonferroni correction.

**Supplementary Table S7: Nuclear CDK6 expression and clinicopathological parameters**

| Parameters                   | Nuclear CDK6 expression |              | <i>p value</i> | <i>Adjusted p value</i> |
|------------------------------|-------------------------|--------------|----------------|-------------------------|
|                              | <i>Low</i>              | <i>High</i>  |                |                         |
|                              | <i>N (%)</i>            | <i>N (%)</i> |                |                         |
| Surgical Pathology Type      |                         |              |                |                         |
| Serous                       | 108 (53%)               | 46 (65%)     | 0.04           | 0.2                     |
| Mucinous                     | 33 (16%)                | 6 (8%)       |                |                         |
| Endometriod                  | 35 (17%)                | 7 (10%)      |                |                         |
| Clear Cell                   | 13 (6%)                 | 3 (4%)       |                |                         |
| Other                        | 6 (3%)                  | 7 (10%)      |                |                         |
| Mixed                        | 10 (5%)                 | 2 (3%)       |                |                         |
| Surgical Pathology Grade     |                         |              |                |                         |
| Low                          | 25 (15%)                | 15 (23%)     | 0.306          | 0.306                   |
| Med                          | 43 (26%)                | 14 (22%)     |                |                         |
| High                         | 99 (59%)                | 35 (55%)     |                |                         |
| Surgical Pathology Stage     |                         |              |                |                         |
| 1                            | 79 (40%)                | 22 (33%)     | 0.08           | 0.4                     |
| 2                            | 37 (19%)                | 6 (9%)       |                |                         |
| 3                            | 73 (37%)                | 35 (53%)     |                |                         |
| 4                            | 7 (4%)                  | 3 (5%)       |                |                         |
| Residual Tumour post-surgery |                         |              |                |                         |
| None                         | 132 (72%)               | 38 (60%)     | 0.161          | 0.32                    |
| <1cm                         | 21 (11%)                | 6 (10%)      |                |                         |
| 1-2cm                        | 9 (5%)                  | 4 (6%)       |                |                         |
| >2cm                         | 23 (12%)                | 15 (24%)     |                |                         |
| Platinum Sensitivity         |                         |              |                |                         |

|           |           |          |      |     |
|-----------|-----------|----------|------|-----|
| Sensitive | 166 (93%) | 51 (86%) | 0.10 | 0.4 |
| Resistant | 12 (7%)   | 8 (14%)  |      |     |

Significant p values are in bold.

Adjusted p value was calculated using Bonferroni correction.

**Supplementary Table S8:** Cytoplasmic CDK6 expression and clinicopathological parameters.

| Parameters                        | Cytoplasmic CDK6 expression |              | <i>p value</i> | <i>Adjusted<br/>P value</i> |
|-----------------------------------|-----------------------------|--------------|----------------|-----------------------------|
|                                   | <i>Low</i>                  | <i>High</i>  |                |                             |
|                                   | <i>N (%)</i>                | <i>N (%)</i> |                |                             |
| Surgical Pathology Type           |                             |              |                |                             |
| Serous                            | 140 (55%)                   | 14 (61%)     | 0.765          | 0.765                       |
| Mucinous                          | 36 (14%)                    | 3 (13%)      |                |                             |
| Endometrioid                      | 39 (16%)                    | 3 (13%)      |                |                             |
| Clear Cell                        | 15 (6%)                     | 1 (4%)       |                |                             |
| Other                             | 13 (5%)                     | 0 (0%)       |                |                             |
| Mixed                             | 10 (4%)                     | 2 (9%)       |                |                             |
| Surgical Pathology Grade          |                             |              |                |                             |
| Low                               | 38 (18%)                    | 2 (10%)      | 0.402          | 0.402                       |
| Med                               | 53 (25%)                    | 4 (19%)      |                |                             |
| High                              | 119 (57%)                   | 15 (71%)     |                |                             |
| Surgical Pathology Stage          |                             |              |                |                             |
| 1                                 | 98 (41%)                    | 3 (13%)      | 0.02           | 0.4                         |
| 2                                 | 40 (17%)                    | 3 (13%)      |                |                             |
| 3                                 | 92 (38%)                    | 16 (70%)     |                |                             |
| 4                                 | 9 (4%)                      | 1 (4%)       |                |                             |
| Residual Tumour Following Surgery |                             |              |                |                             |
| Non                               | 160 (70%)                   | 10 (50%)     | 0.261          | 0.261                       |
| <1cm                              | 23 (10%)                    | 4 (20%)      |                |                             |
| 1-2cm                             | 11 (5%)                     | 2 (10%)      |                |                             |
| >2cm                              | 34 (15%)                    | 4 (20%)      |                |                             |
| Platinum Sensitivity              |                             |              | 0.85           | 0.85                        |
| Sensitive                         | 198 (92%)                   | 19 (90%)     |                |                             |
| Resistant                         | 18 (8%)                     | 2 (10%)      |                |                             |

Significant p values are in bold.

Adjusted p value was calculated using Bonferroni correction.

**Supplementary Table S9:** Nuclear and cytoplasmic CDK6 co-expression and clinicopathological parameters.

| Parameters                   | CDK6 Nuclear (n) and cytoplasmic (c) co-expression |                  |                   |                  | <i>p value</i> | <i>Adjusted P value</i> |
|------------------------------|----------------------------------------------------|------------------|-------------------|------------------|----------------|-------------------------|
|                              | Low (n)-low (c)                                    | High (n)-low (c) | High (n)-high (c) | Low (n)-high (c) |                |                         |
|                              | <i>N (%)</i>                                       | <i>N (%)</i>     | <i>N (%)</i>      | <i>N (%)</i>     |                |                         |
| Pathology Type               |                                                    |                  |                   |                  |                |                         |
| Serous                       | 97 (52%)                                           | 43 (64%)         | 3 (75%)           | 11 (58%)         | 0.360          | 0.360                   |
| Mucinous                     | 30 (16%)                                           | 6 (9%)           | 0 (0%)            | 3 (16%)          |                |                         |
| Endometriod                  | 33 (18%)                                           | 6 (9%)           | 1 (25%)           | 2 (10%)          |                |                         |
| Clear Cell                   | 12 (7%)                                            | 3 (5%)           | 0 (0%)            | 1 (6%)           |                |                         |
| Other                        | 6 (3%)                                             | 7 (10%)          | 0 (0%)            | 0 (0%)           |                |                         |
| Mixed                        | 8 (4%)                                             | 2 (3%)           | 0 (0%)            | 2 (10%)          |                |                         |
| Pathology Grade              |                                                    |                  |                   |                  |                |                         |
| Low                          | 24 (16%)                                           | 14 (23%)         | 1 (33%)           | 1 (6%)           | 0.550          | 0.550                   |
| Med                          | 39 (26%)                                           | 14 (23%)         | 0 (0%)            | 4 (22%)          |                |                         |
| High                         | 86 (58%)                                           | 33 (54%)         | 2 (67%)           | 13 (72%)         |                |                         |
| Pathology Stage              |                                                    |                  |                   |                  |                |                         |
| 1                            | 77 (44%)                                           | 21 (34%)         | 1 (25%)           | 2 (11%)          | 0.03           | 0.15                    |
| 2                            | 34 (19%)                                           | 6 (10%)          | 0 (0%)            | 3 (16%)          |                |                         |
| 3                            | 60 (34%)                                           | 32 (51%)         | 3 (75%)           | 13 (68%)         |                |                         |
| 4                            | 6 (3%)                                             | 3 (5%)           | 0(0%)             | 1 (5%)           |                |                         |
| Residual Tumour post-surgery |                                                    |                  |                   |                  |                |                         |
| None                         | 123 (73%)                                          | 37 (63%)         | 1 (25%)           | 9 (56%)          | 0.01           | 0.06                    |
| <1cm                         | 17 (10%)                                           | 6 (10%)          | 0 (0%)            | 4 (25%)          |                |                         |
| 1-2cm                        | 7 (4%)                                             | 4 (7%)           | 0 (0%)            | 2 (13%)          |                |                         |

|                             |           |          |         |          |       |       |
|-----------------------------|-----------|----------|---------|----------|-------|-------|
| >2cm                        | 22 (13%)  | 12 (20%) | 3 (75%) | 1 (6%)   |       |       |
| <b>Platinum Sensitivity</b> |           |          |         |          | 0.333 | 0.333 |
| Sensitive                   | 150 (93%) | 48 (87%) | 3 (75%) | 16 (94%) |       |       |
| Resistant                   | 11 (7%)   | 7 (13%)  | 1 (25%) | 1 (6%)   |       |       |

**Supplementary Table S10:** Nuclear Cyclin D1 expression and clinicopathological parameters.

| Parameters                   | Nuclear Cyclin D1 expression |                   | p value | Adjusted p value |
|------------------------------|------------------------------|-------------------|---------|------------------|
|                              | Low H score ≤180             | High H score >180 |         |                  |
|                              | N (%)                        | N (%)             |         |                  |
| Pathology Type               |                              |                   |         |                  |
| Serous                       | 140 (57%)                    | 0 (0%)            | 0.001   | 0.005            |
| Mucinous                     | 27 (11%)                     | 4 (44%)           |         |                  |
| Endometriod                  | 31 (13%)                     | 4 (44%)           |         |                  |
| Clear Cell                   | 19 (8%)                      | 1 (12%)           |         |                  |
| Other                        | 14 (6%)                      | 0 (0%)            |         |                  |
| Mixed                        | 13 (5%)                      | 0 (0%)            |         |                  |
| Pathology Grade              |                              |                   |         |                  |
| Low                          | 32 (15%)                     | 0 (0%)            | <0.0001 | <0.0001          |
| Med                          | 37 (18%)                     | 5 (83%)           |         |                  |
| High                         | 137 (67%)                    | 1 (17%)           |         |                  |
| Pathology Stage              |                              |                   |         |                  |
| 1                            | 91 (39%)                     | 7 (78%)           | 0.127   | 0.40             |
| 2                            | 35 (15%)                     | 0 (0%)            |         |                  |
| 3                            | 100 (43%)                    | 2 (22%)           |         |                  |
| 4                            | 7 (3%)                       | 0 (0%)            |         |                  |
| Residual tumour post-surgery |                              |                   |         |                  |
| None                         | 153 (69%)                    | 7 (88%)           | 0.309   | 0.309            |
| <1cm                         | 28 (13%)                     | 0 (0%)            |         |                  |
| 1-2cm                        | 10 (4%)                      | 1 (12%)           |         |                  |
| >2cm                         | 32 (14%)                     | 0 (0%)            |         |                  |

|                             |           |          |       |       |
|-----------------------------|-----------|----------|-------|-------|
| <b>Platinum Sensitivity</b> |           |          | 0.315 | 0.315 |
| Sensitive                   | 186 (90%) | 9 (100%) |       |       |
| Resistant                   | 21 (10%)  | 0 (0%)   |       |       |

Significant p values are in bold.

Adjusted p value was calculated using Bonferroni correction.



**Supplementary Table S11:** Cytoplasmic Cyclin D1 expression and clinicopathological parameters.

| Parameters                        | Cytoplasmic Cyclin D1 expression |                           | <i>p value</i> | <i>Adjusted p value</i> |
|-----------------------------------|----------------------------------|---------------------------|----------------|-------------------------|
|                                   | <i>Low H score ≤10</i>           | <i>High H score&gt;10</i> |                |                         |
|                                   | <i>N (%)</i>                     | <i>N (%)</i>              |                |                         |
| Pathology Type                    |                                  |                           |                |                         |
| Serous                            | 129 (56%)                        | 11 (51%)                  | 0.988          | 0.988                   |
| Mucinous                          | 28 (12%)                         | 3 (14%)                   |                |                         |
| Endometrioid                      | 31 (13%)                         | 4 (18%)                   |                |                         |
| Clear Cell                        | 18 (8%)                          | 2 (9%)                    |                |                         |
| Other                             | 13 (6%)                          | 1 (4%)                    |                |                         |
| Mixed                             | 12 (5%)                          | 1 (4%)                    |                |                         |
| Pathology Grade                   |                                  |                           |                |                         |
| Low                               | 28 (14%)                         | 4 (22%)                   | 0.668          | 0.668                   |
| Med                               | 39 (20%)                         | 3 (17%)                   |                |                         |
| High                              | 127 (66%)                        | 11 (61%)                  |                |                         |
| Pathology Stage                   |                                  |                           |                |                         |
| 1                                 | 86 (39%)                         | 12 (54%)                  | 0.475          | 0.475                   |
| 2                                 | 32 (15%)                         | 3 (14%)                   |                |                         |
| 3                                 | 95 (43%)                         | 7 (32%)                   |                |                         |
| 4                                 | 7 (3%)                           | 0 (0%)                    |                |                         |
| Residual Tumour Following Surgery |                                  |                           |                |                         |
| None                              | 143 (68%)                        | 17 (85%)                  | 0.112          | 0.448                   |
| <1cm                              | 27 (13%)                         | 1 (5%)                    |                |                         |
| 1-2cm                             | 9 (4%)                           | 2 (10%)                   |                |                         |
| >2cm                              | 32 (15%)                         | 0 (0%)                    |                |                         |
| Platinum Sensitivity              |                                  |                           | 0.974          | 0.974                   |
| Sensitive                         | 176 (90%)                        | 19 (90%)                  |                |                         |
| Resistant                         | 19 (10%)                         | 2 (10%)                   |                |                         |

Significant p values are in bold

Adjusted p value was calculated using Bonferroni correction.

**Supplementary Table S12:** Nuclear and cytoplasmic Cyclin D1 co-expression and clinicopathological parameters.

| Parameters                   | Cyclin D1 Nuclear (n) and cytoplasmic (c) co-expression |                  |                   |                  | p value | Adjusted P value |
|------------------------------|---------------------------------------------------------|------------------|-------------------|------------------|---------|------------------|
|                              | Low (n)-low (c)                                         | High (n)-low (c) | High (n)-high (c) | Low (n)-high (c) |         |                  |
|                              | N (%)                                                   | N (%)            |                   |                  |         |                  |
| Pathology Type               |                                                         |                  |                   |                  |         |                  |
| Serous                       | 129 (57%)                                               | 0 (0%)           | 0 (0%)            | 11 (58%)         | 0.073   | 0.3500           |
| Mucinous                     | 25 (11%)                                                | 3 (50%)          | 1 (33%)           | 2 (10%)          |         |                  |
| Endometriod                  | 29 (13%)                                                | 2 (33%)          | 2 (67%)           | 2 (10%)          |         |                  |
| Clear Cell                   | 17 (8%)                                                 | 1 (17%)          | 0 (0%)            | 2 (10%)          |         |                  |
| Other                        | 13 (6%)                                                 | 0 (0%)           | 0 (0%)            | 1 (6%)           |         |                  |
| Mixed                        | 12 (5%)                                                 | 0 (0%)           | 0 (0%)            | 1 (6%)           |         |                  |
| Pathology Grade              |                                                         |                  |                   |                  |         |                  |
| Low                          | 28 (15%)                                                | 0 (0%)           | 0 (0%)            | 4 (25%)          | 0.005   | 0.0350           |
| Med                          | 36 (19%)                                                | 3 (75%)          | 2 (100%)          | 1 (6%)           |         |                  |
| High                         | 126 (66%)                                               | 1 (25%)          | 0 (0%)            | 11 (69%)         |         |                  |
| Pathology Stage              |                                                         |                  |                   |                  |         |                  |
| 1                            | 82 (38%)                                                | 4 (67%)          | 3 (100%)          | 9 (47%)          | 0.537   | 0.537            |
| 2                            | 32 (15%)                                                | 0 (0%)           | 0 (0%)            | 3 (16%)          |         |                  |
| 3                            | 93 (44%)                                                | 2 (33%)          | 0 (0%)            | 7 (37%)          |         |                  |
| 4                            | 7 (3%)                                                  | 0 (0%)           | 0(0%)             | 0 (0%)           |         |                  |
| Residual tumour posy-surgery |                                                         |                  |                   |                  |         |                  |
| None                         | 139 (68%)                                               | 4 (80%)          | 3 (100%)          | 14 (82%)         | 0.260   | 0.26             |
| <1cm                         | 27 (13%)                                                | 0 (0%)           | 0 (0%)            | 1 (6%)           |         |                  |
| 1-2cm                        | 8 (4%)                                                  | 1 (20%)          | 0 (0%)            | 2 (12%)          |         |                  |

|                             |           |          |          |          |       |       |
|-----------------------------|-----------|----------|----------|----------|-------|-------|
| >2cm                        | 32 (15%)  | 0 (0%)   | 0 (0%)   | 0 (0%)   |       |       |
| <b>Platinum Sensitivity</b> |           |          |          |          | 0.793 | 0.793 |
| Sensitive                   | 170 (90%) | 6 (100%) | 3 (100%) | 16 (89%) |       |       |
| Resistant                   | 19 (10%)  | 0 (0%)   | 0 (0%)   | 2 (11%)  |       |       |

Significant p values are in bold.

Adjusted p value was calculated using Bonferroni correction.

**Supplementary Table S13.** Nuclear Cyclin E1 expression and clinicopathological parameters.

| Parameters             | Nuclear Cyclin E expression |                          |                |                         |
|------------------------|-----------------------------|--------------------------|----------------|-------------------------|
|                        | <i>Low</i>                  | <i>High</i>              | <i>p value</i> | <i>Adjusted p value</i> |
|                        | <i>(H score ≤140)</i>       | <i>(H score &gt;140)</i> |                |                         |
|                        | <i>N (%)</i>                | <i>N (%)</i>             |                |                         |
| <b>Pathology Type</b>  |                             |                          |                |                         |
| <b>Serous</b>          | 116 (58%)                   | 34 (64%)                 | <b>0.031</b>   | 0.155                   |
| <b>Mucinous</b>        | 25 (13%)                    | 3 (6%)                   |                |                         |
| <b>Endometriod</b>     | 31 (15%)                    | 3 (6%)                   |                |                         |
| <b>Clear Cell</b>      | 12 (6%)                     | 7 (13%)                  |                |                         |
| <b>Other</b>           | 11 (5%)                     | 1 (2%)                   |                |                         |
| <b>Mixed</b>           | 7 (3%)                      | 5 (9%)                   |                |                         |
| <b>Pathology Grade</b> |                             |                          |                |                         |
| <b>Low</b>             | 24 (14%)                    | 7 (16%)                  | 0.411          | 0.82                    |
| <b>Med</b>             | 38 (22%)                    | 6 (13%)                  |                |                         |
| <b>High</b>            | 108 (64%)                   | 32 (71%)                 |                |                         |
| <b>Pathology Stage</b> |                             |                          |                |                         |
| <b>1</b>               | 80 (42%)                    | 15 (28%)                 | 0.247          | 0.74                    |

|                                     |           |          |              |      |
|-------------------------------------|-----------|----------|--------------|------|
| <b>2</b>                            | 29 (15%)  | 8 (15%)  |              |      |
| <b>3</b>                            | 78 (41%)  | 27 (51%) |              |      |
| <b>4</b>                            | 5 (2%)    | 3 (6%)   |              |      |
| <b>Residual tumour post Surgery</b> |           |          |              |      |
| <b>Non</b>                          | 134 (74%) | 25 (50%) | <b>0.009</b> | 0.06 |
| <b>&lt;1cm</b>                      | 21 (12%)  | 9 (18%)  |              |      |
| <b>1-2cm</b>                        | 8 (4%)    | 3 (6%)   |              |      |
| <b>&gt;2cm</b>                      | 19 (10%)  | 13 (26%) |              |      |
| <b>Platinum Sensitivity</b>         |           |          |              |      |
| <b>Sensitive</b>                    | 158 (93%) | 39 (87%) | 0.177        | 0.71 |
| <b>Resistant</b>                    | 12 (7%)   | 6 (13%)  |              |      |

**Supplementary Table S14:** Cytoplasmic Cyclin E1 expression and clinicopathological parameters.

| Parameters                   | Cytoplasmic Cyclin E expression |                   | <i>p value</i> | <i>Adjusted P value</i> |
|------------------------------|---------------------------------|-------------------|----------------|-------------------------|
|                              | <i>Low ≤80</i>                  | <i>High&gt;80</i> |                |                         |
|                              | <i>N (%)</i>                    | <i>N (%)</i>      |                |                         |
| Pathology Type               |                                 |                   |                |                         |
| Serous                       | 29 (37%)                        | 121 (68%)         | <0.0001        | <0.0001                 |
| Mucinous                     | 17 (22%)                        | 11 (6%)           |                |                         |
| Endometriod                  | 13 (16%)                        | 21 (12%)          |                |                         |
| Clear Cell                   | 11 (14%)                        | 8 (5%)            |                |                         |
| Other                        | 4 (5%)                          | 8 (5%)            |                |                         |
| Mixed                        | 5 (6%)                          | 7 (4%)            |                |                         |
| Pathology Grade              |                                 |                   |                |                         |
| Low                          | 15 (24%)                        | 16 (11%)          | 0.041          | 0.124                   |
| Med                          | 12 (19%)                        | 32 (21%)          |                |                         |
| High                         | 36 (57%)                        | 104 (68%)         |                |                         |
| Pathology Stage              |                                 |                   |                |                         |
| 1                            | 38 (50%)                        | 57 (34%)          | 0.031          | 0.123                   |
| 2                            | 14 (18%)                        | 23 (14%)          |                |                         |
| 3                            | 24 (31%)                        | 81 (48%)          |                |                         |
| 4                            | 1 (1%)                          | 7 (4%)            |                |                         |
| Residual Tumour post-surgery |                                 |                   |                |                         |
| None                         | 59 (80%)                        | 100 (63%)         | 0.090          | 0.18                    |
| <1cm                         | 7 (9%)                          | 23 (15%)          |                |                         |
| 1-2cm                        | 2 (3%)                          | 9 (6%)            |                |                         |
| >2cm                         | 6 (8%)                          | 26 (16%)          |                |                         |
| Platinum Sensitivity         |                                 |                   | 0.871          | 0.817                   |
| Sensitive                    | 62 (91%)                        | 135 (92%)         |                |                         |
| Resistant                    | 6 (9%)                          | 12 (8%)           |                |                         |

Significant p values are in bold.

Adjusted p value was calculated using Bonferroni correction.

**Supplementary Table S15:** Nuclear and cytoplasmic Cyclin E1 co-expression and clinicopathological parameters.

| Parameters                   | Nuclear (n) and cytoplasmic (c) co-expression |                  |                   |                  | p value | Adjusted P value |
|------------------------------|-----------------------------------------------|------------------|-------------------|------------------|---------|------------------|
|                              | Low (n)-low (c)                               | High (n)-low (c) | High (n)-high (c) | Low (n)-high (c) |         |                  |
|                              | N (%)                                         | N (%)            |                   |                  |         |                  |
| Pathology Type               |                                               |                  |                   |                  |         |                  |
| Serous                       | 25 (37%)                                      | 4 (37%)          | 30 (73%)          | 91 (67%)         | 0.001   | 0.006            |
| Mucinous                     | 15 (22%)                                      | 2 (18%)          | 1 (2%)            | 10 (7%)          |         |                  |
| Endometrioid                 | 12 (18%)                                      | 1 (9%)           | 2 (5%)            | 19 (14%)         |         |                  |
| Clear Cell                   | 8 (12%)                                       | 2 (18%)          | 4 (10%)           | 5 (4%)           |         |                  |
| Other                        | 4 (6%)                                        | 0 (0%)           | 1 (2%)            | 7 (5%)           |         |                  |
| Mixed                        | 3 (5%)                                        | 2 (18%)          | 3 (8%)            | 4 (3%)           |         |                  |
| Pathology Grade              |                                               |                  |                   |                  |         |                  |
| Low                          | 11 (21%)                                      | 4 (44%)          | 3 (9%)            | 13 (11%)         | 0.062   | 0.242            |
| Med                          | 11 (21%)                                      | 1 (12%)          | 5 (14%)           | 27 (23%)         |         |                  |
| High                         | 31 (58%)                                      | 4 (44%)          | 27 (77%)          | 78 (66%)         |         |                  |
| Pathology Stage              |                                               |                  |                   |                  |         |                  |
| 1                            | 32 (49%)                                      | 6 (55%)          | 9 (22%)           | 48 (38%)         | 0.088   | 0.264            |
| 2                            | 13 (20%)                                      | 1 (9%)           | 7 (17%)           | 16 (12%)         |         |                  |
| 3                            | 19 (29%)                                      | 4 (36%)          | 22 (54%)          | 60 (47%)         |         |                  |
| 4                            | 1 (2%)                                        | 0 (0%)           | 3 (7%)            | 4 (3%)           |         |                  |
| Residual tumour post-surgery |                                               |                  |                   |                  |         |                  |
| None                         | 51 (81%)                                      | 7 (70%)          | 17 (44%)          | 84 (70%)         | 0.013   | 0.06             |
| <1cm                         | 7 (11%)                                       | 0 (0%)           | 9 (23%)           | 14 (12%)         |         |                  |

|                             |          |         |          |           |              |              |
|-----------------------------|----------|---------|----------|-----------|--------------|--------------|
| 1-2cm                       | 2 (3%)   | 0 (0%)  | 3 (8%)   | 6 (5%)    |              |              |
| >2cm                        | 3 (5%)   | 3 (30%) | 10 (25%) | 16 (13%)  |              |              |
| <b>Platinum Sensitivity</b> |          |         |          |           | <b>0.464</b> | <b>0.464</b> |
| Sensitive                   | 52 (91%) | 9 (90%) | 29 (85%) | 107 (94%) |              |              |
| Resistant                   | 5 (9%)   | 1 (10%) | 5 (15%)  | 7 (6%)    |              |              |

Significant p values are in bold.

Adjusted p value was calculated using Bonferroni correction



**Supplementary Table S16:** Nuclear RB1 expression and clinicopathological parameters.

| Parameters                   | Nuclear RB1 expression |              | <i>p value</i> | <i>Adjusted p value</i> |
|------------------------------|------------------------|--------------|----------------|-------------------------|
|                              | <i>Low</i>             | <i>High</i>  |                |                         |
|                              | <i>N (%)</i>           | <i>N (%)</i> |                |                         |
| Pathology Type               |                        |              |                |                         |
| Serous                       | 98 (62%)               | 63 (49%)     | 0.134          | 0.40                    |
| Mucinous                     | 20 (13%)               | 18 (14%)     |                |                         |
| Endometrioid                 | 19 (12%)               | 19 (15%)     |                |                         |
| Clear Cell                   | 7 (4%)                 | 16 (13%)     |                |                         |
| Other                        | 5 (3%)                 | 5 (4%)       |                |                         |
| Mixed                        | 9 (6%)                 | 7 (5%)       |                |                         |
| Pathology Grade              |                        |              |                |                         |
| Low                          | 21 (16%)               | 14 (13%)     | 0.736          | 0.736                   |
| Med                          | 29 (21%)               | 21 (19%)     |                |                         |
| High                         | 86 (63%)               | 74 (68%)     |                |                         |
| Pathology Stage              |                        |              |                |                         |
| 1                            | 59 (39%)               | 46 (37%)     | 0.817          | 0.817                   |
| 2                            | 21 (14%)               | 22 (18%)     |                |                         |
| 3                            | 68 (45%)               | 52 (42%)     |                |                         |
| 4                            | 4 (2%)                 | 4 (3%)       |                |                         |
| Residual tumour post-surgery |                        |              |                |                         |
| None                         | 102 (69%)              | 77 (69%)     | 0.599          | 0.599                   |
| <1cm                         | 19 (13%)               | 13 (12%)     |                |                         |
| 1-2cm                        | 9 (6%)                 | 4 (3%)       |                |                         |
| >2cm                         | 17 (12%)               | 18 (16%)     |                |                         |

| <b>Platinum Sensitivity</b> |           |          | <b>0.01</b> | 0.06 |
|-----------------------------|-----------|----------|-------------|------|
| Sensitive                   | 128 (95%) | 93 (86%) |             |      |
| Resistant                   | 7 (5%)    | 15 (14%) |             |      |

Significant p values are in bold.

Adjusted p value was calculated using Bonferroni correction.

**Supplementary Table S17:** Cytoplasmic RB1 expression and clinicopathological parameters.

| Parameters                   | Cytoplasmic RB1 expression |              | <i>p value</i> | <i>Adjusted<br/>p value</i> |
|------------------------------|----------------------------|--------------|----------------|-----------------------------|
|                              | <i>Low</i>                 | <i>High</i>  |                |                             |
|                              | <i>N (%)</i>               | <i>N (%)</i> |                |                             |
| Pathology Type               |                            |              |                |                             |
| Serous                       | 136 (54%)                  | 25 (72%)     | 0.304          | 0.618                       |
| Mucinous                     | 36 (14%)                   | 2 (6%)       |                |                             |
| Endometriod                  | 35 (14%)                   | 3 (8%)       |                |                             |
| Clear Cell                   | 22 (9%)                    | 1 (3%)       |                |                             |
| Other                        | 9 (4%)                     | 1 (3%)       |                |                             |
| Mixed                        | 13 (5%)                    | 3 (8%)       |                |                             |
| Pathology Grade              |                            |              |                |                             |
| Low                          | 33 (15%)                   | 2 (7%)       | 0.138          | 0.690                       |
| Med                          | 47 (22%)                   | 3 (11%)      |                |                             |
| High                         | 137 (63%)                  | 23 (82%)     |                |                             |
| Pathology Stage              |                            |              |                |                             |
| 1                            | 94 (39%)                   | 11 (32%)     | 0.196          | 0.784                       |
| 2                            | 40 (17%)                   | 3 (9%)       |                |                             |
| 3                            | 100 (41%)                  | 20 (59%)     |                |                             |
| 4                            | 8 (3%)                     | 0 (0%)       |                |                             |
| Residual tumour post-surgery |                            |              |                |                             |
| None                         | 160 (71%)                  | 19 (58%)     | 0.04           | 0.2                         |
| <1cm                         | 23 (10%)                   | 9 (27%)      |                |                             |
| 1-2cm                        | 12 (5%)                    | 1 (3%)       |                |                             |

|                             |           |          |       |      |
|-----------------------------|-----------|----------|-------|------|
| >2cm                        | 31 (14%)  | 4 (12%)  |       |      |
| <b>Platinum Sensitivity</b> |           |          | 0.282 | 0.84 |
| Sensitive                   | 194 (90%) | 27 (96%) |       |      |
| Resistant                   | 21 (10%)  | 1 (4%)   |       |      |

Significant p values are in bold.

Adjusted p value was calculated using Bonferroni correction.

**Supplementary Table S18:** Nuclear and cytoplasmic RB1 co-expression and clinicopathological parameters.

| Parameters                  | RB1 Nuclear (n) and cytoplasmic (c) co-expression |                                           |                                     |                                              | p value | Adjusted<br>p value |
|-----------------------------|---------------------------------------------------|-------------------------------------------|-------------------------------------|----------------------------------------------|---------|---------------------|
|                             | Negative nuclear and<br>cytoplasmic               | Positive nuclear,<br>negative cytoplasmic | Positive nuclear and<br>cytoplasmic | Positive<br>cytoplasmic,<br>negative nuclear |         |                     |
|                             | N (%)                                             | N (%)                                     | N (%)                               | N (%)                                        |         |                     |
| Surgical Pathology Type     |                                                   |                                           |                                     |                                              |         |                     |
| Serous                      | 74 (60%)                                          | 62 (49%)                                  | 1 (100%)                            | 24 (70%)                                     | 0.619   | 0.619               |
| Mucinous                    | 18 (14%)                                          | 18 (14%)                                  | 0 (0%)                              | 2 (6%)                                       |         |                     |
| Endometrioid                | 16 (13%)                                          | 19 (15%)                                  | 0 (0%)                              | 3 (9%)                                       |         |                     |
| Clear Cell                  | 6 (5%)                                            | 16 (13%)                                  | 0 (0%)                              | 1 (3%)                                       |         |                     |
| Other                       | 4 (3%)                                            | 5 (4%)                                    | 0 (0%)                              | 1 (3%)                                       |         |                     |
| Mixed                       | 6 (5%)                                            | 7 (5%)                                    | 0 (0%)                              | 3 (9%)                                       |         |                     |
| Surgical Pathology Grade    |                                                   |                                           |                                     |                                              |         |                     |
| Low                         | 19 (17%)                                          | 14 (13%)                                  | 0 (0%)                              | 2 (7%)                                       | 0.06    | 0.246               |
| Med                         | 27 (25%)                                          | 20 (18%)                                  | 1 (100%)                            | 2 (7%)                                       |         |                     |
| High                        | 63 (58%)                                          | 74 (69%)                                  | 0 (0%)                              | 23 (86%)                                     |         |                     |
| Surgical Pathology Stage    |                                                   |                                           |                                     |                                              |         |                     |
| 1                           | 48 (41%)                                          | 46 (37%)                                  | 0 (0%)                              | 11 (33%)                                     | 0.753   | 0.735               |
| 2                           | 18 (15%)                                          | 22 (18%)                                  | 0 (0%)                              | 3 (9%)                                       |         |                     |
| 3                           | 49 (41%)                                          | 51 (42%)                                  | 1 (100%)                            | 19 (58%)                                     |         |                     |
| 4                           | 4 (3%)                                            | 4 (3%)                                    | 0(0%)                               | 0 (0%)                                       |         |                     |
| Surgical Pathology Substage |                                                   |                                           |                                     |                                              |         |                     |
| A                           | 24 (27%)                                          | 25 (25%)                                  |                                     | 3 (11%)                                      | 0.308   | 0.924               |
| B                           | 9 (10%)                                           | 12 (12%)                                  |                                     | 6 (23%)                                      |         |                     |

|                                          |           |          |          |          |       |      |
|------------------------------------------|-----------|----------|----------|----------|-------|------|
| <b>C</b>                                 | 57 (63%)  | 63 (63%) |          | 17 (65%) |       |      |
| <b>Residual Tumour Following Surgery</b> |           |          |          |          |       |      |
| <b>Non</b>                               | 84 (73%)  | 76 (68%) | 1 (100%) | 18 (56%) | 0.226 | 0.45 |
| <b>&lt;1cm</b>                           | 10 (9%)   | 13 (12%) | 0 (0%)   | 9 (28%)  |       |      |
| <b>1-2cm</b>                             | 8 (7%)    | 4 (4%)   | 0 (0%)   | 1 (3%)   |       |      |
| <b>&gt;2cm</b>                           | 13 (11%)  | 18 (16%) | 0 (0%)   | 4 (13%)  |       |      |
| <b>Platinum Sensitivity</b>              |           |          |          |          | 0.119 | 0.35 |
| <b>Sensitive</b>                         | 102 (94%) | 92 (86%) | 1 (100%) | 26 (96%) |       |      |
| <b>Resistant</b>                         | 6 (6%)    | 15 (14%) | 0 (0%)   | 1 (4%)   |       |      |

**Supplementary Table S19:** Nuclear pRB1 expression and clinicopathological parameters.

| Parameters                   | Nuclear pRB1 expression |              | <i>p value</i> | <i>Adjusted<br/>p value</i> |
|------------------------------|-------------------------|--------------|----------------|-----------------------------|
|                              | <i>Low</i>              | <i>High</i>  |                |                             |
|                              | <i>N (%)</i>            | <i>N (%)</i> |                |                             |
| Pathology Type               |                         |              |                |                             |
| Serous                       | 137 (55%)               | 24 (70%)     | 0.380          | 0.380                       |
| Mucinous                     | 35 (14%)                | 1 (3%)       |                |                             |
| Endometrioid                 | 37 (15%)                | 3 (9%)       |                |                             |
| Clear Cell                   | 19 (8%)                 | 2 (6%)       |                |                             |
| Other                        | 9 (3%)                  | 2 (6%)       |                |                             |
| Mixed                        | 14 (5%)                 | 2 (6%)       |                |                             |
| Pathology Grade              |                         |              |                |                             |
| Low                          | 32 (15%)                | 4 (13%)      | 0.850          | 0.850                       |
| Med                          | 43 (20%)                | 5 (17%)      |                |                             |
| High                         | 138 (65%)               | 21 (70%)     |                |                             |
| Pathology Stage              |                         |              |                |                             |
| 1                            | 97(40%)                 | 8 (24%)      | 0.181          | 0.360                       |
| 2                            | 39(16%)                 | 4 (12%)      |                |                             |
| 3                            | 100 (41%)               | 19 (58%)     |                |                             |
| 4                            | 7 (3%)                  | 2 (6%)       |                |                             |
| Residual Tumour post-surgery |                         |              |                |                             |
| None                         | 159 (70%)               | 19 (61%)     | 0.363          | 0.363                       |
| <1cm                         | 26 (11%)                | 7 (23%)      |                |                             |
| 1-2cm                        | 12 (5%)                 | 1 (3%)       |                |                             |
| >2cm                         | 31 (14%)                | 4 (13%)      |                |                             |
| Platinum Sensitivity         |                         |              | 0.629          | 0.629                       |
| Sensitive                    | 200 (91%)               | 23 (88%)     |                |                             |
| Resistant                    | 19 (9%)                 | 3 (12%)      |                |                             |

Significant p values are in bold.

Adjusted p value was calculated using Bonferroni correction.

**Supplementary Table S20:** Cytoplasmic pRB1 expression and clinicopathological parameters.

| Parameters                        | Cytoplasmic pRB1 expression |              | <i>p value</i> | <i>Adjusted p value</i> |
|-----------------------------------|-----------------------------|--------------|----------------|-------------------------|
|                                   | <i>Low</i>                  | <i>High</i>  |                |                         |
|                                   | <i>N (%)</i>                | <i>N (%)</i> |                |                         |
| Surgical Pathology Type           |                             |              |                |                         |
| Serous                            | 136 (54.6%)                 | 25 (67.6%)   | 0.497          | 0.497                   |
| Mucinous                          | 34 (13.7%)                  | 2 (5.4%)     |                |                         |
| Endometrioid                      | 34 (13.7%)                  | 6 (16.2%)    |                |                         |
| Clear Cell                        | 21 (8.4%)                   | 1 (2.7%)     |                |                         |
| Other                             | 10 (4%)                     | 1 (2.7%)     |                |                         |
| Mixed                             | 14 (5.6%)                   | 2 (5.4%)     |                |                         |
| Surgical Pathology Grade          |                             |              |                |                         |
| Low                               | 31 (14.8%)                  | 5 (15.2%)    | 0.969          | 0.969                   |
| Med                               | 41 (19.5%)                  | 7 (21.2%)    |                |                         |
| High                              | 138 (65.7%)                 | 21 (63.6%)   |                |                         |
| Surgical Pathology Stage          |                             |              |                |                         |
| 1                                 | 90 (37.7%)                  | 15 (40.5%)   | 0.980          | 0.980                   |
| 2                                 | 37 (15.5%)                  | 6 (16.2%)    |                |                         |
| 3                                 | 104 (43.5%)                 | 15 (40.5%)   |                |                         |
| 4                                 | 8 (3.3%)                    | 1 (2.7%)     |                |                         |
| Residual Tumour Following Surgery |                             |              |                |                         |
| Non                               | 153 (68%)                   | 25 (73.5%)   | 0.512          | 0.512                   |
| <1cm                              | 28 (12.4%)                  | 5 (14.7%)    |                |                         |
| 1-2cm                             | 13 (5.8%)                   | 0 (0%)       |                |                         |
| >2cm                              | 31 (13.8%)                  | 4 (11.8%)    |                |                         |
| Platinum Sensitivity              |                             |              | 0.199          | 0.39                    |
| Sensitive                         | 191 (90.1%)                 | 32 (97%)     |                |                         |
| Resistant                         | 21 (9.9%)                   | 1 (3%)       |                |                         |

Significant p values are in bold.

Adjusted p value was calculated using Bonferroni correction.



Supplementary Table S21: Nuclear and cytoplasmic pRB1 co-expression and clinicopathological parameters

| Parameters                   | Nuclear (n) and cytoplasmic (c) co-expression |                         |                          |                         | <i>p value</i> | <i>Adjusted<br/>p value</i> |
|------------------------------|-----------------------------------------------|-------------------------|--------------------------|-------------------------|----------------|-----------------------------|
|                              | <i>Low (n)-low (c)</i>                        | <i>High (n)-low (c)</i> | <i>High (n)-high (c)</i> | <i>Low (n)-high (c)</i> |                |                             |
|                              | <i>N (%)</i>                                  | <i>N (%)</i>            | <i>N (%)</i>             | <i>N (%)</i>            |                |                             |
| Pathology Type               |                                               |                         |                          |                         |                |                             |
| Serous                       | 117 (53%)                                     | 20 (70%)                | 5 (62%)                  | 19 (71%)                | 0.413          | 0.413                       |
| Mucinous                     | 34 (15%)                                      | 1 (3%)                  | 1 (13%)                  | 0 (0%)                  |                |                             |
| Endometriod                  | 33 (14%)                                      | 4 (14%)                 | 2 (25%)                  | 1 (4%)                  |                |                             |
| Clear Cell                   | 18 (8%)                                       | 1 (3%)                  | 0 (0%)                   | 3 (11%)                 |                |                             |
| Other                        | 8 (4%)                                        | 1 (3%)                  | 0 (0%)                   | 2 (7%)                  |                |                             |
| Mixed                        | 12 (6%)                                       | 2 (7%)                  | 0 (0%)                   | 2 (7%)                  |                |                             |
| Pathology Grade              |                                               |                         |                          |                         |                |                             |
| Low                          | 28 (15%)                                      | 4 (15%)                 | 1 (17%)                  | 3 (12%)                 | 0.924          | 0.924                       |
| Med                          | 38 (20%)                                      | 5 (18%)                 | 2 (33%)                  | 3 (12%)                 |                |                             |
| High                         | 120 (65%)                                     | 18 (67%)                | 3 (50%)                  | 18 (76%)                |                |                             |
| Pathology Stage              |                                               |                         |                          |                         |                |                             |
| 1                            | 87 (41%)                                      | 10 (35%)                | 5 (63%)                  | 3 (12%)                 | 0.156          | 0.312                       |
| 2                            | 34 (16%)                                      | 5 (17%)                 | 1 (12%)                  | 3 (12%)                 |                |                             |
| 3                            | 87 (41%)                                      | 13 (45%)                | 2 (25%)                  | 17 (68%)                |                |                             |
| 4                            | 6 (2%)                                        | 1 (3%)                  | 0 (0%)                   | 2 (8%)                  |                |                             |
| Residual Tumour post-surgery |                                               |                         |                          |                         |                |                             |
| None                         | 138 (69%)                                     | 21 (78%)                | 4 (57%)                  | 15 (63%)                | 0.364          | 0.364                       |
| <1cm                         | 24 (12%)                                      | 2 (7%)                  | 3 (43%)                  | 4 (16%)                 |                |                             |
| 1-2cm                        | 12 (6%)                                       | 0 (0%)                  | 0 (0%)                   | 1 (5%)                  |                |                             |

|                             |           |          |          |          |       |       |
|-----------------------------|-----------|----------|----------|----------|-------|-------|
| >2cm                        | 27 (13%)  | 4 (15%)  | 0 (0%)   | 4 (16%)  |       |       |
| <b>Platinum Sensitivity</b> |           |          |          |          | 0.451 | 0.451 |
| Sensitive                   | 175 (91%) | 25 (96%) | 7 (100%) | 16 (84%) |       |       |
| Resistant                   | 18 (9%)   | 1 (4%)   | 0 (0%)   | 3 (16%)  |       |       |

Significant p values are in bold.

Adjusted p value was calculated using Bonferroni correction.



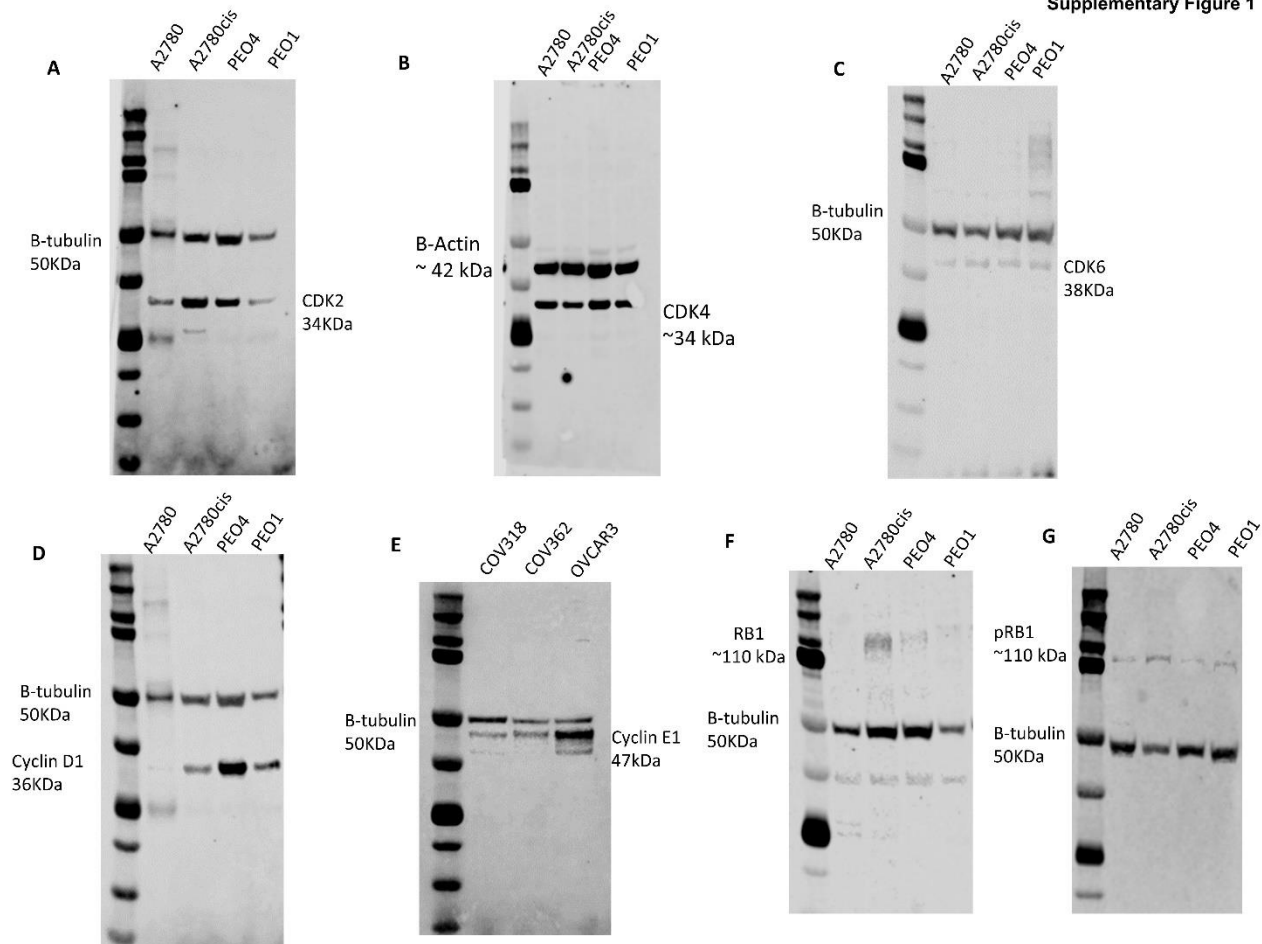

**Supplementary Figure S1.** **A.** Western blot showing CDK2 expression in PEO1, PRO4, A2780 and A2780cis ovarian cancer cell lines. **B.** Western blot showing CDK4 expression in PEO1, PRO4, A2780 and A2780cis ovarian cancer cell lines. **C.** Western blot showing CDK6 expression in PEO1, PRO4, A2780 and A2780cis ovarian cancer cell lines. **D.** Western blot showing cyclin D1 expression in PEO1, PRO4, A2780 and A2780cis ovarian cancer cell lines. **E.** Western blot showing cyclin E1 expression in PEO1, PRO4, A2780 and A2780cis ovarian cancer cell lines. **F.** Western blot showing RB1 expression in PEO1, PRO4, A2780 and A2780cis ovarian cancer cell lines. **G.** Western blot showing pRB1 expression in PEO1, PRO4, A2780 and A2780cis ovarian cancer cell lines.

Supplementary Figure 2

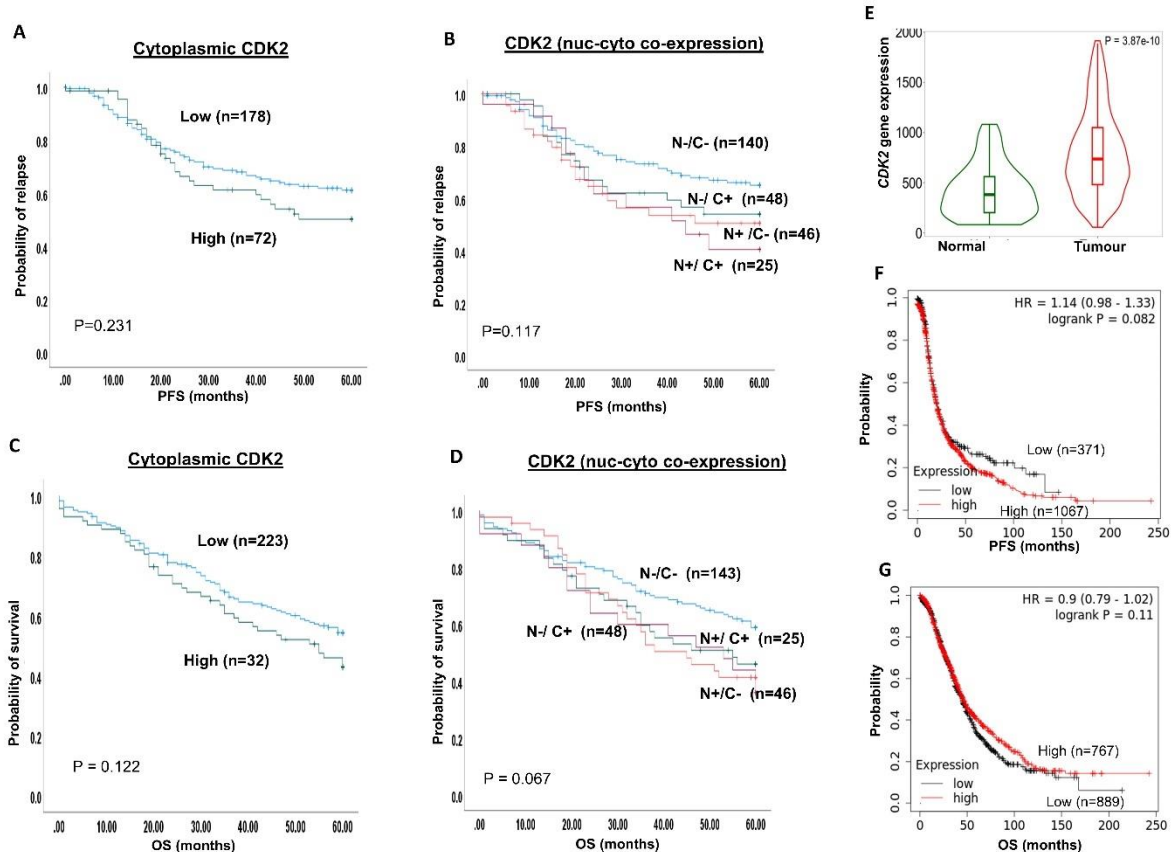

**Supplementary Figure S2.** **A.** Kaplan-Meier curve for CDK2 cytoplasmic expression and progression free survival. **B.** Kaplan-Meier curve for CDK2 nuclear & cytoplasmic co-expression and progression free survival. **C.** Kaplan-Meier curve for CDK2 cytoplasmic expression and overall survival. **D.** Kaplan-Meier curve for CDK2 nuclear & cytoplasmic co-expression and overall survival. **E.** Violin plot shows the median of CDK2 mRNA expression in normal and ovarian tumors; the red and green central bars represent the median, long green, and red lines represent the interquartile range. On each side of the red and green lines is a kernel density estimation to show the distribution shape of the data. **F.** Kaplan-Meier curve for CDK2 mRNA expression and progression free survival. **G.** Kaplan-Meier curve for CDK2 mRNA expression and overall survival.

Supplementary Figure 3

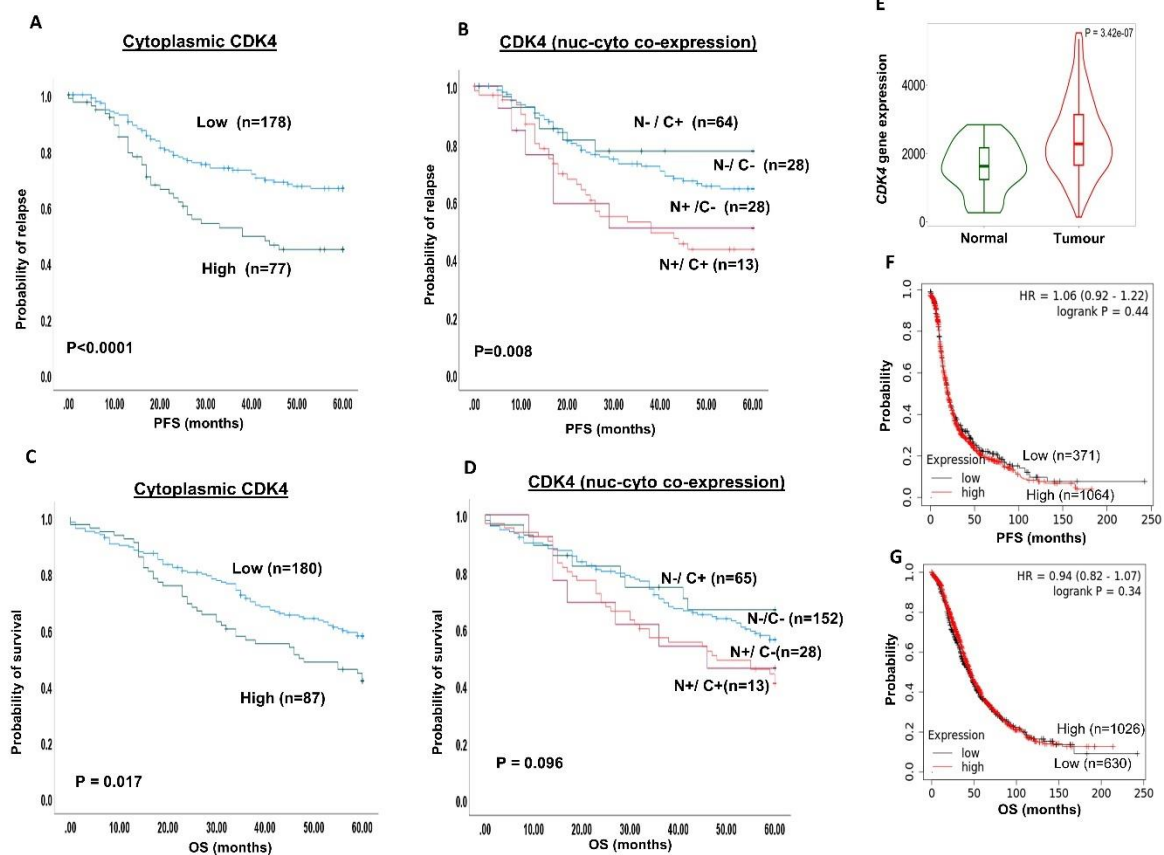

**Supplementary Figure S3.** A. Kaplan-Meier curve for CDK4 cytoplasmic expression and progression free survival. B. Kaplan-Meier curve for CDK4 nuclear & cytoplasmic co-expression and progression free survival. C. Kaplan-Meier curve for CDK4 cytoplasmic expression and overall survival. D. Kaplan-Meier curve for CDK4 nuclear & cytoplasmic co-expression and overall survival. E. Violin plot shows the median of *CDK4* mRNA expression in normal and ovarian tumors; the red and green central bars represent the median, long green, and red lines represent the interquartile range. On each side of the red and green lines is a kernel density estimation to show the distribution shape of the data. F. Kaplan-Meier curve for *CDK4* mRNA expression and progression free survival. G. Kaplan-Meier curve for *CDK4* mRNA expression and overall survival.

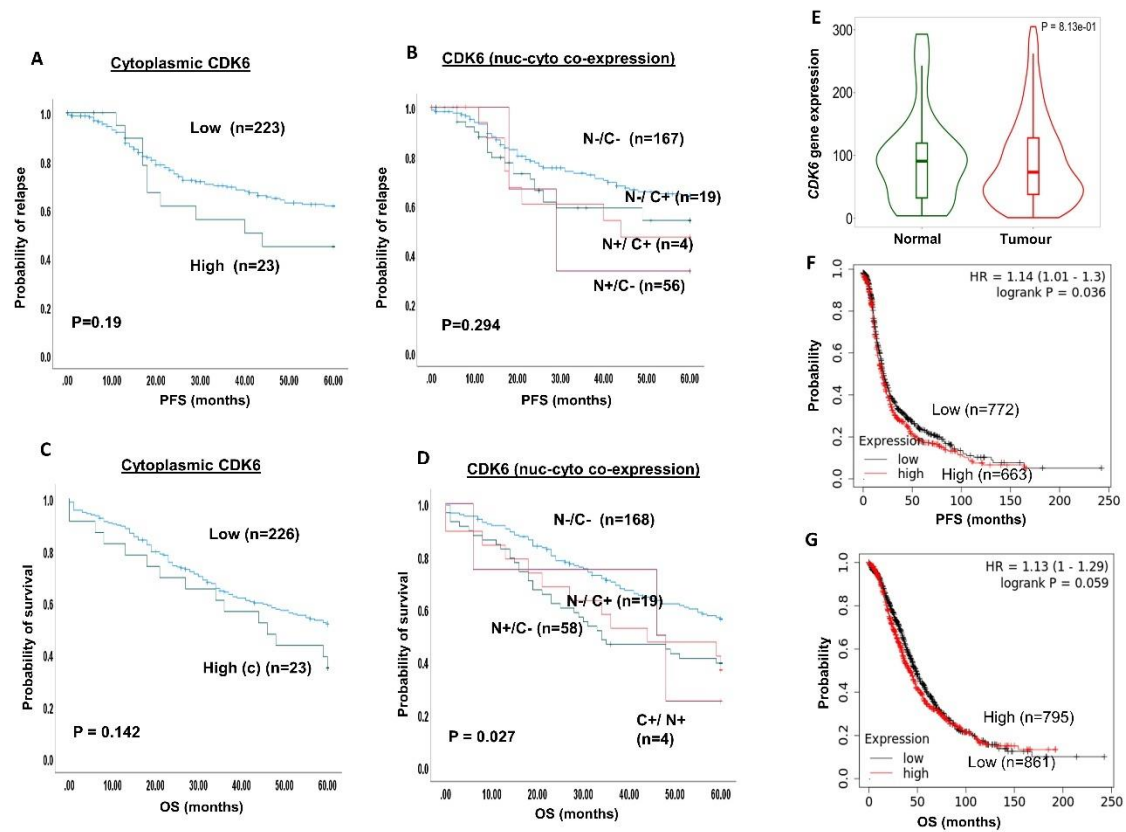

**Supplementary Figure S4.** **A.** Kaplan-Meier curve for CDK6 cytoplasmic expression and progression free survival. **B.** Kaplan-Meier curve for CDK6 nuclear & cytoplasmic co-expression and progression free survival. **C.** Kaplan-Meier curve for CDK6 cytoplasmic expression and overall survival. **D.** Kaplan-Meier curve for CDK6 nuclear & cytoplasmic co-expression and overall survival. **E.** Violin plot shows the median of CDK6 mRNA expression in normal and ovarian tumors; the red and green central bars represent the median, long green, and red lines represent the interquartile range. On each side of the red and green lines is a kernel density estimation to show the distribution shape of the data. **F.** Kaplan-Meier curve for CDK6 mRNA expression and progression free survival. **G.** Kaplan-Meier curve for CDK6 mRNA expression and overall survival.

Supplementary Figure 5

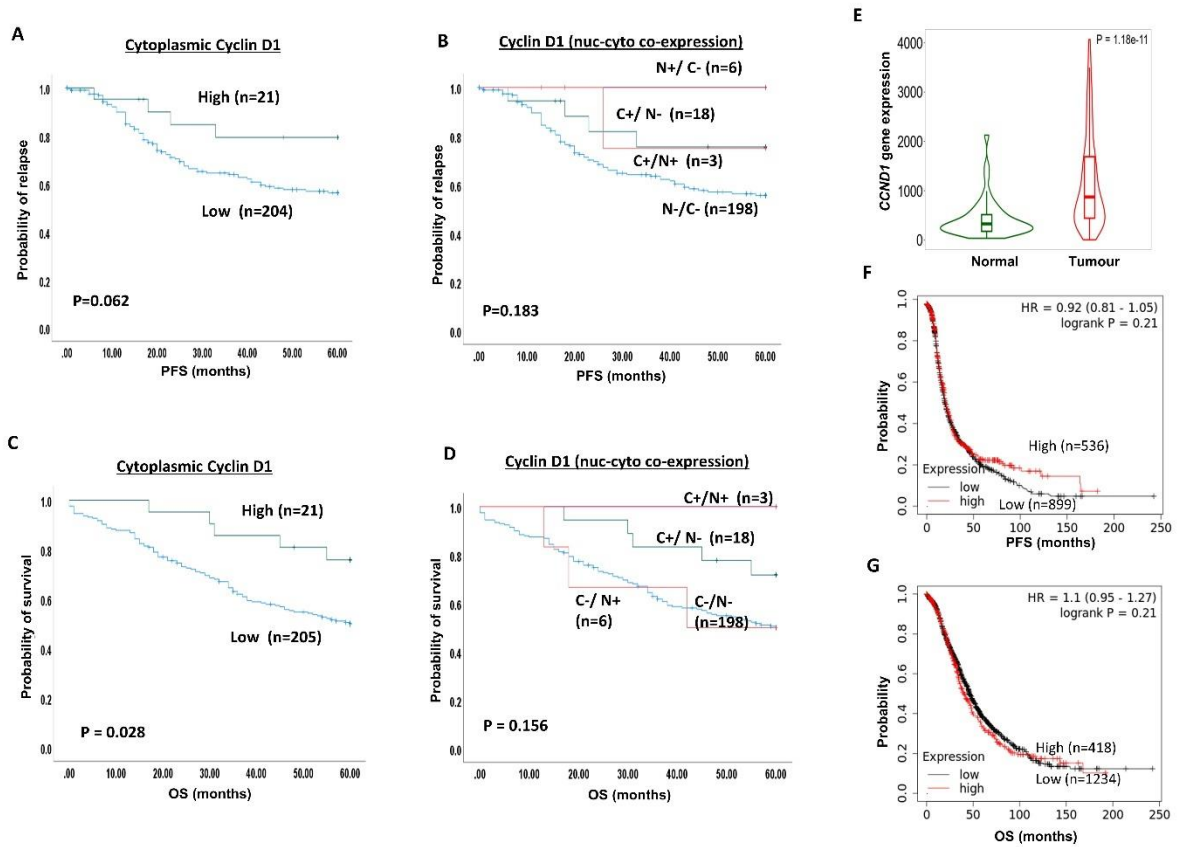

**Supplementary Figure S5.** **A.** Kaplan-Meier curve for Cyclin D1 cytoplasmic expression and progression free survival. **B.** Kaplan-Meier curve for Cyclin D1 nuclear & cytoplasmic co-expression and progression free survival. **C.** Kaplan-Meier curve for Cyclin D1 cytoplasmic expression and overall survival. **D.** Kaplan-Meier curve for Cyclin D1 nuclear & cytoplasmic co-expression and overall survival. **E.** Violin plot shows the median of *Cyclin D1* mRNA expression in normal and ovarian tumors; the red and green central bars represent the median, long green, and red lines represent the interquartile range. On each side of the red and green lines is a kernel density estimation to show the distribution shape of the data. **F.** Kaplan-Meier curve for *Cyclin D1* mRNA expression and progression free survival. **G.** Kaplan-Meier curve for *Cyclin D1* mRNA expression and overall survival.



Supplementary Figure 6

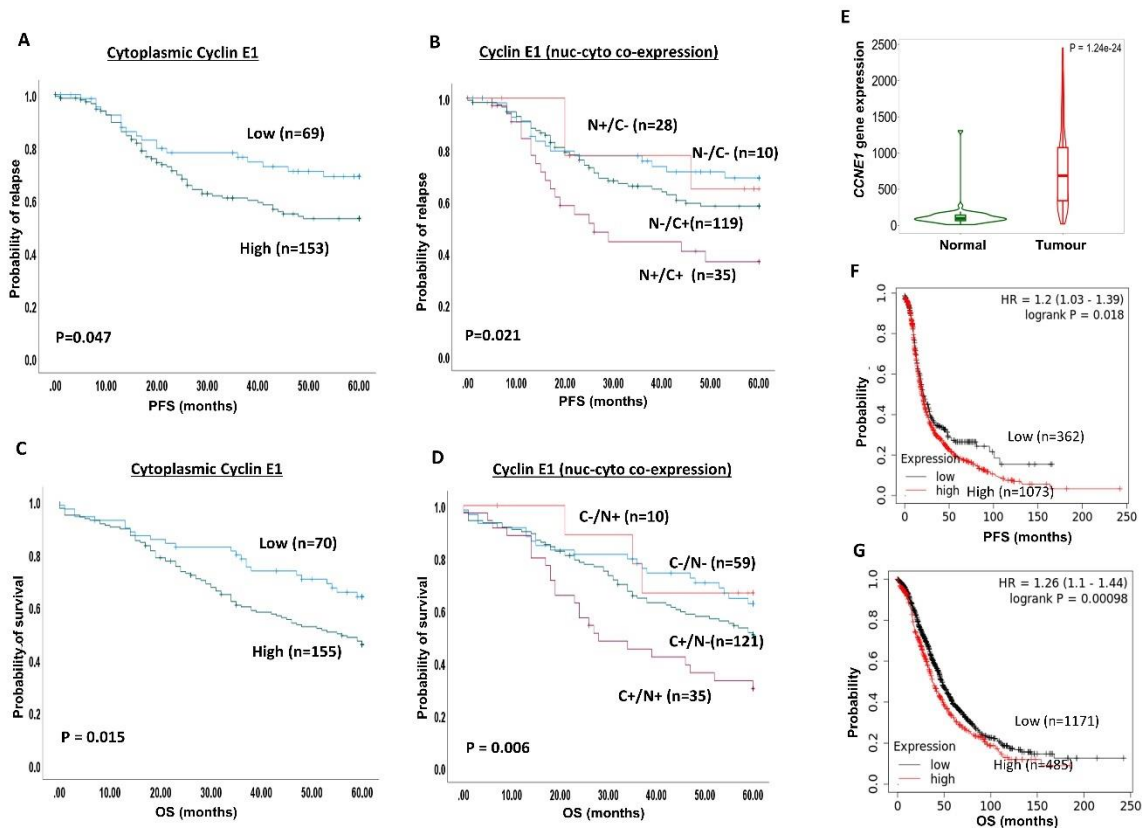

**Supplementary Figure S6.** A. Kaplan-Meier curve for Cyclin E1 cytoplasmic expression and progression free survival. B. Kaplan-Meier curve for Cyclin E1 nuclear & cytoplasmic co-expression and progression free survival. C. Kaplan-Meier curve for Cyclin E1 cytoplasmic expression and overall survival. D. Kaplan-Meier curve for Cyclin E1 nuclear & cytoplasmic co-expression and overall survival. E. Violin plot shows the median of *Cyclin E1* mRNA expression in normal and ovarian tumors; the red and green central bars represent the median, long green, and red lines represent the interquartile range. On each side of the red and green lines is a kernel density estimation to show the distribution shape of the data. F. Kaplan-Meier curve for *Cyclin E1* mRNA expression and progression free survival. G. Kaplan-Meier curve for *Cyclin E1* mRNA expression and overall survival.

Supplementary Figure 7

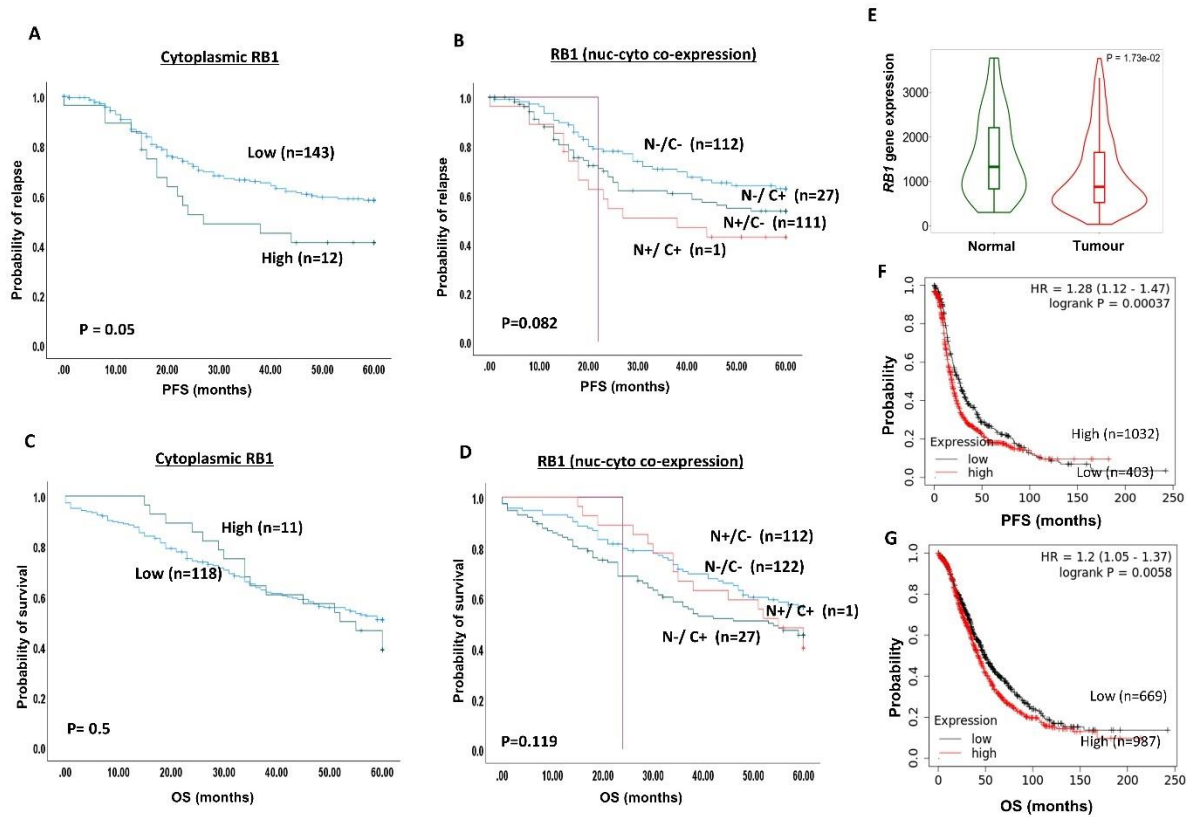

**Supplementary Figure S7.** **A.** Kaplan-Meier curve for RB1 cytoplasmic expression and progression free survival. **B.** Kaplan-Meier curve for RB1 nuclear & cytoplasmic co-expression and progression free survival. **C.** Kaplan-Meier curve for RB1 cytoplasmic expression and overall survival. **D.** Kaplan-Meier curve for RB1 nuclear & cytoplasmic co-expression and overall survival. **E.** Violin plot shows the median of *RB1* mRNA expression in normal and ovarian tumors; the red and green central bars represent the median, long green, and red lines represent the interquartile range. On each side of the red and green lines is a kernel density estimation to show the distribution shape of the data. **F.** Kaplan-Meier curve for *RB1* mRNA expression and progression free survival. **G.** Kaplan-Meier curve for *RB1* mRNA expression and overall survival.

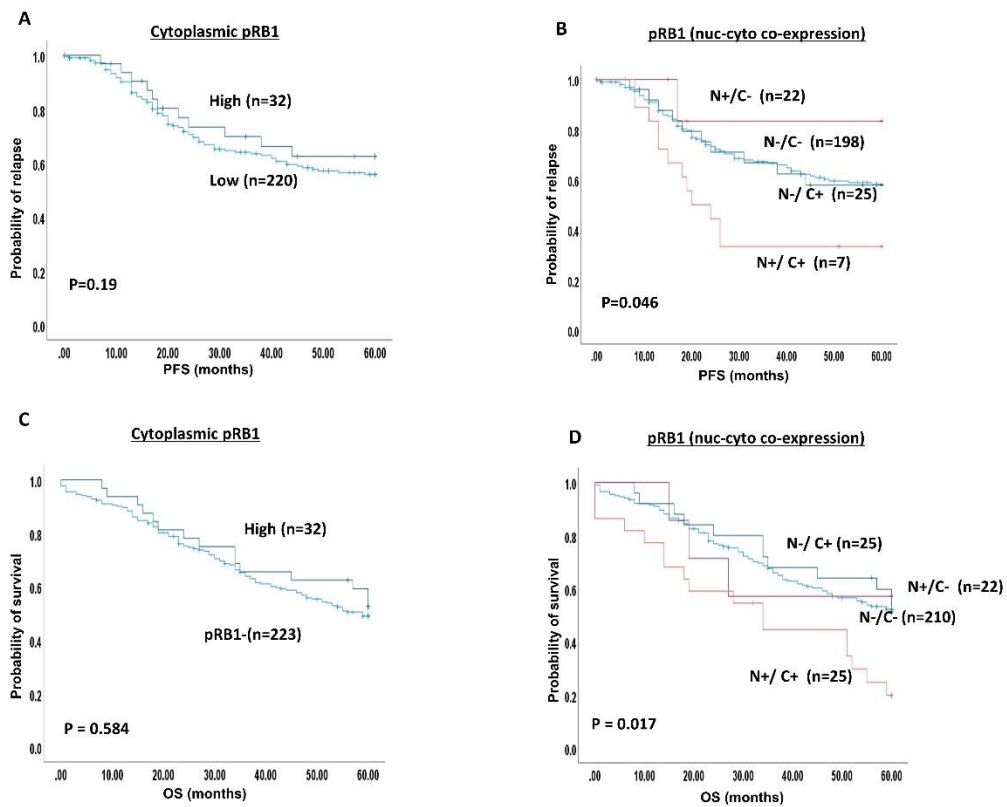

**Supplementary Figure S8.** **A.** Kaplan-Meier curve for pRB1 cytoplasmic expression and progression free survival. **B.** Kaplan-Meier curve for pRB1 nuclear & cytoplasmic co-expression and progression free survival. **C.** Kaplan-Meier curve for pRB1 cytoplasmic expression and overall survival. **D.** Kaplan-Meier curve for pRB1 nuclear & cytoplasmic co-expression and overall survival
